# Supplementary material for: Organotypic brain explant culture as a drug evaluation system for malignant brain tumors
Source: PubMed Central journal article supplement (PMC5673912; doi:10.1002/cam4.1174), 2017-10-04
Supplement: CAM4-6-2635-s001.pdf [file CAM4-6-2635-s001.pdf]

## Supplemental material

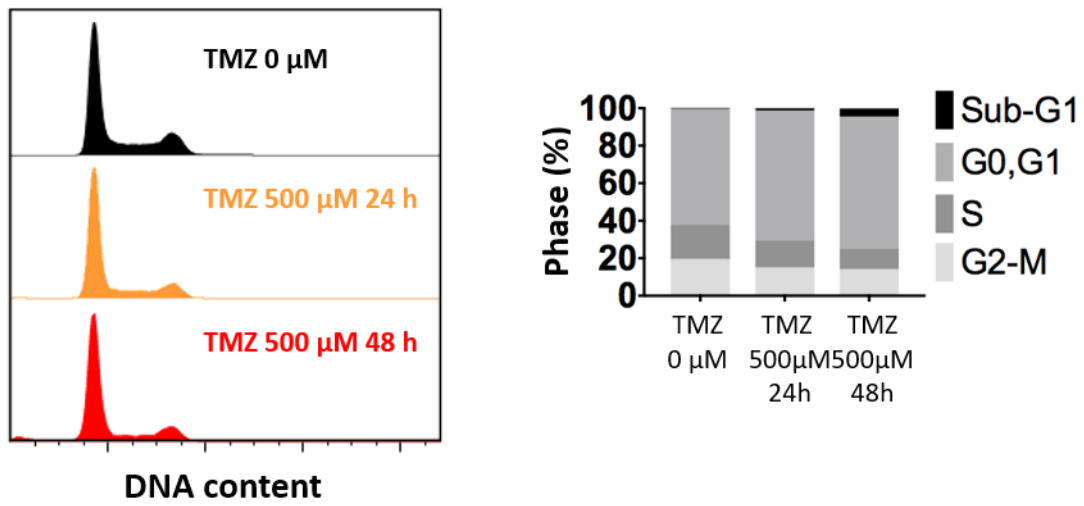

**Fig. S1:** Flow cytometric analysis of cell cycle profile for RasR cells exposed to 0 or to 500  $\mu\text{M}$  TMZ for 24h or 48 h (n=1).

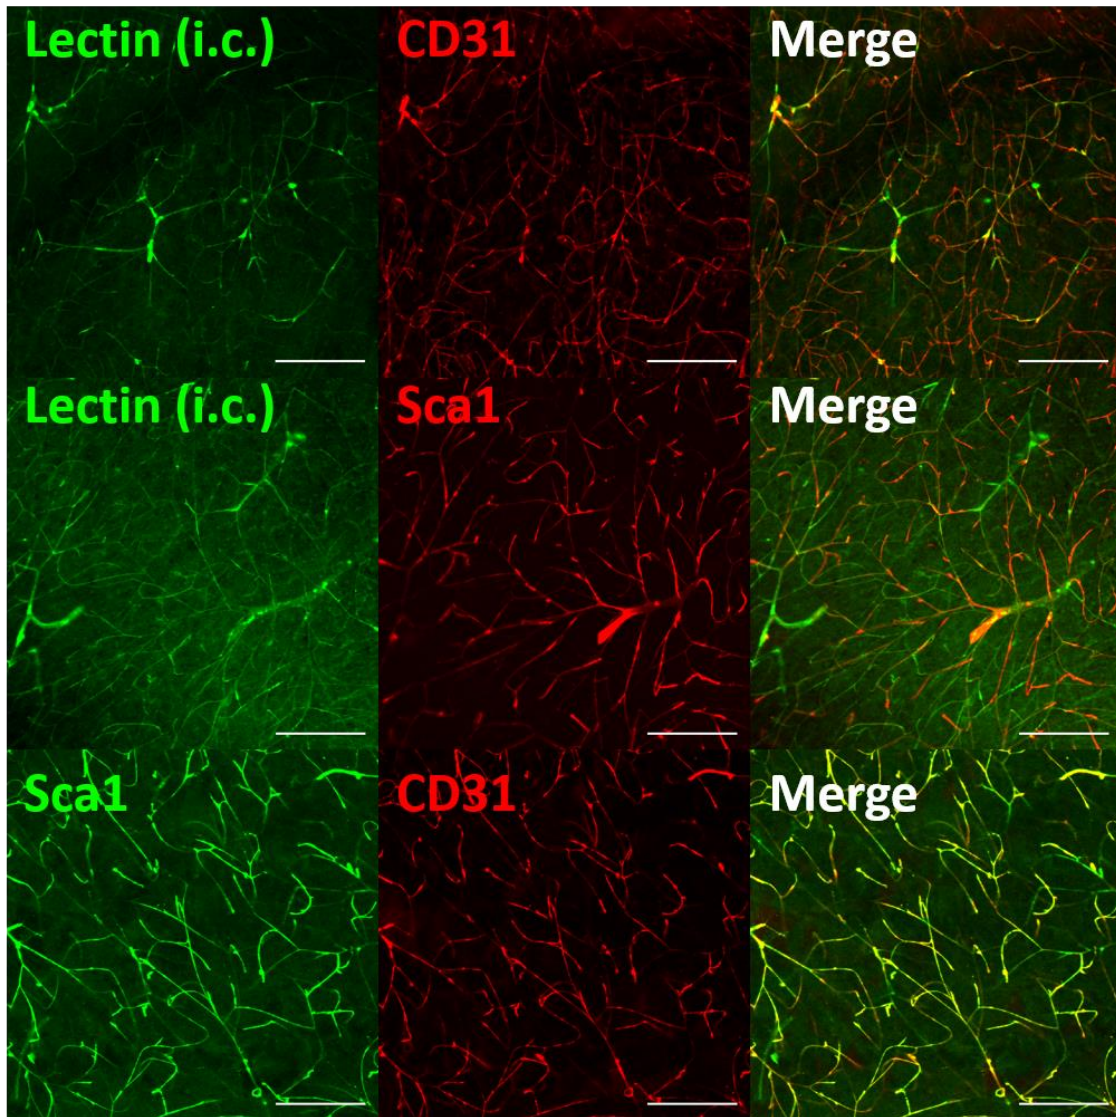

**Fig. S2.:** Confirmation of live staining of blood vessels in tumor-free explants. Explants derived from mice injected intracardially (i.c.) with FITC-conjugated isolectin B4 were subjected to blocking of Fc receptors followed by staining with PE-conjugated antibodies to CD31 (top row) or to Sca1 (middle row). Alternatively, an explant derived from a noninjected mouse was stained with FITC-conjugated antibodies to Sca1 and PE-conjugated antibodies to CD31 after blocking of Fc receptors. Scale bars, 300  $\mu\text{m}$ .

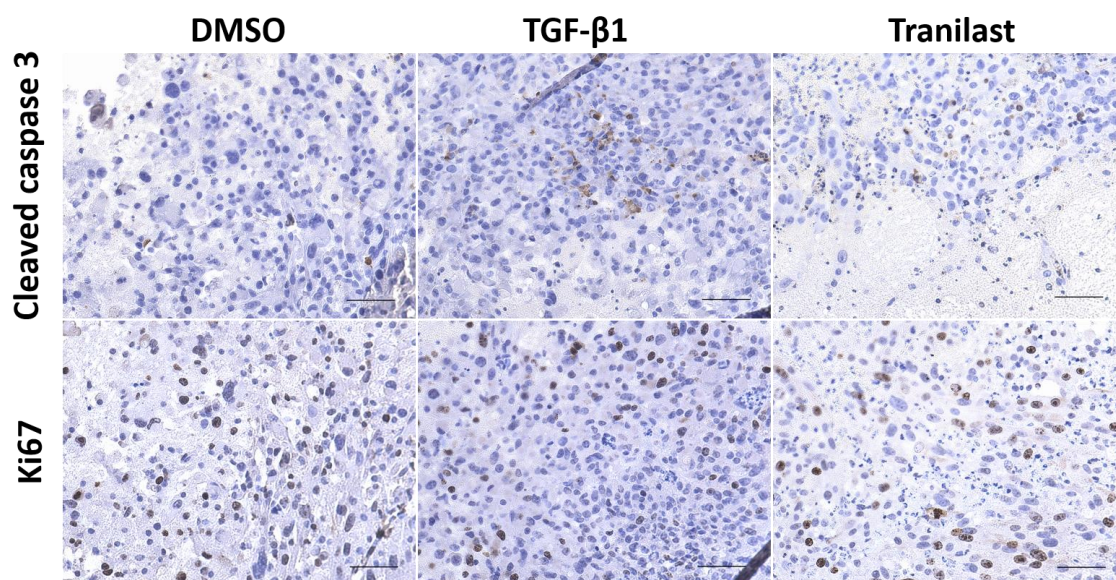

**Fig. S3.** Effects of tranilast and TGF-β1 on apoptosis and cell proliferation in tumor-bearing explants. Explants from Figure 5C were subjected to immunohistochemical staining for cleaved caspase 3 and Ki67 on day 4. Scale bars, 50 μm.

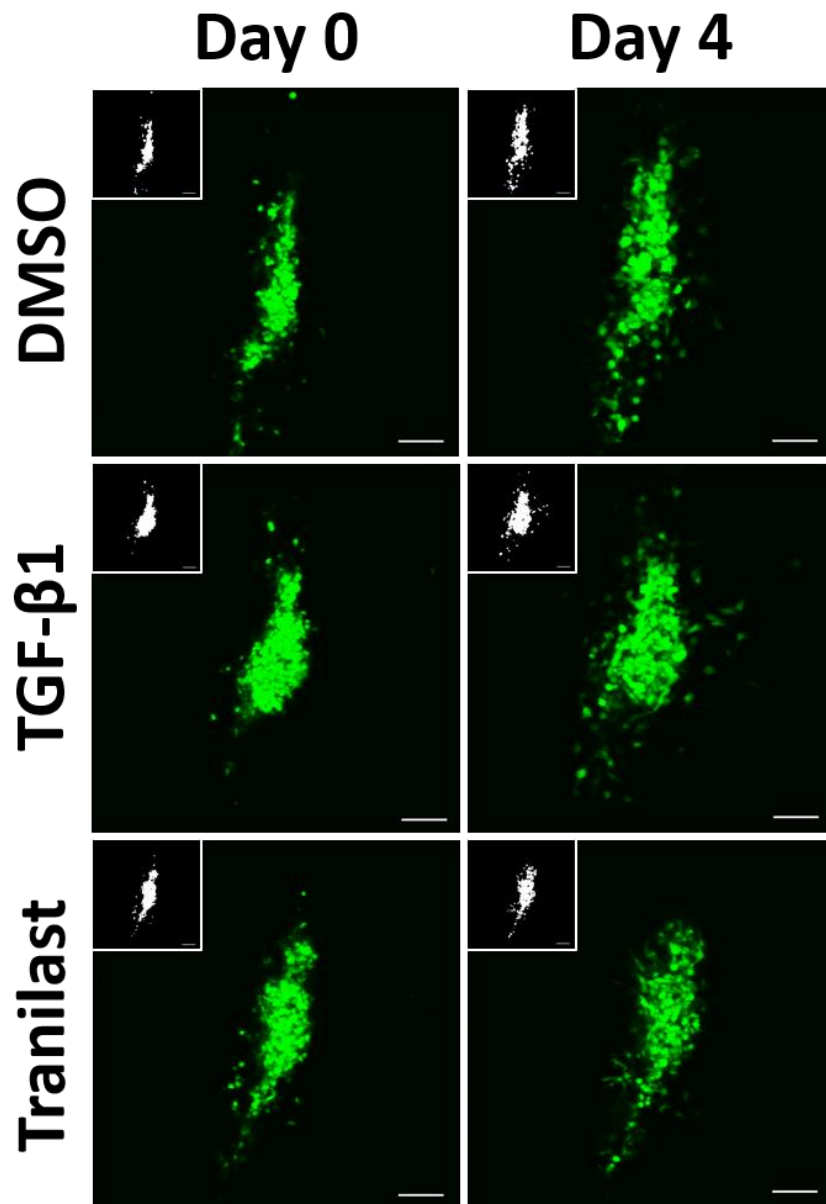

**Fig. S4.** Visualization of MADM mouse-derived GFP-positive *Tp53*<sup>-/-</sup>;*Nf1*<sup>-/-</sup> glioma cells in organotypic slices prepared from recipient C57BL/6J mice at 13 days after implantation. Slices were treated with DMSO, TGF-β1 (10 ng/ml), or tranilast (100 μM) for 0 or 4 days. Scale bars, 100 μm.

**Video S1.** Time-lapse imaging of MADM mouse-derived GFP-positive *Tp53*<sup>-/-</sup>;*Nf1*<sup>-/-</sup> glioma cells in organotypic slices prepared from recipient C57BL/6 mice. Slices were treated with DMSO, TGF-β1 (10 ng/ml), or tranilast (100 μM). Images were acquired every 30 min.
